# Supplementary material for: Protein O-mannosylation deficiency increases LprG-associated lipoarabinomannan release by Mycobacterium tuberculosis and enhances the TLR2-associated inflammatory response
Source: PubMed Central journal article supplement (PMC5554173; doi:10.1038/s41598-017-08489-7), 2017-08-11
Supplement: 41598_2017_8489_MOESM1_ESM.pdf [file 41598_2017_8489_MOESM1_ESM.pdf]

1 SUPPLEMENTARY INFORMATION

2

3

4 **Protein O-mannosylation deficiency increases LprG-associated**  
5 **lipoarabinomannan release by *Mycobacterium tuberculosis* and enhances the**  
6 **TLR2-associated inflammatory response.**

7

8 **Henar Alonso<sup>1</sup>, Julien Parra<sup>1</sup>, Wladimir Malaga<sup>1</sup>, Delphine Payros<sup>1</sup>, Chia-Fang Liu<sup>1</sup>, Céline Berrone<sup>1</sup>,**  
9 **Camille Robert<sup>1</sup>, Etienne Meunier<sup>1</sup>, Odile Burlet-Schiltz<sup>1</sup>, Michel Rivière<sup>1\*</sup>, Christophe Guilhot<sup>1\*</sup>**

10

11

12 **Supplementary Figure S1: CID-MS/MS spectra of the selected mannoprotein glycopeptides.**

13 **Supplementary Figure S2: Construction of *M. tuberculosis* mutants deficient for the production of**  
14 **various O-mannosylated proteins.**

15 A) Schematic description of the strategy used to produce and to analyze the various mutants.

16 B) PCR analyses of the various *M. tuberculosis* mutants using selected couples of primers.

17

18 **Supplementary Figure S3: Growth of WT, mutant and complemented strains on 7H11 solid medium**

19 A) Serial dilutions of adjusted liquid cultures of the various mutants were spotted onto solid 7H11  
20 OADC medium and incubated at 37°C. The results showed that both the  $\Delta pmt$  and the  $\Delta lprG$   
21 mutants were impaired in their capacity to form colonies.

22 B) Complementation of the  $\Delta lprG$  mutant. Several constructs based on an integrative plasmid  
23 harboring either *lprG* or *Rv1410c* alone, or the *lprG-Rv1410c* operon, were transferred in the  
24  $\Delta lprG$  mutant. Complementation was evaluated as the restored capacity to form colonies on  
25 7H11 OADC plate. The results indicated that both *lprG* and *Rv1410c* were required for  
26 complementation of the  $\Delta lprG$  mutant.

27

28 **Supplementary Figure S4: Growth of the bacterial population in the lung of infected mice and**  
29 **proportion of each mutant in the inoculum mix.**

30 A) Number of cfu in the lung of infected mice after 1, 14 and 28 days of infection. CfU were  
31 evaluated by plating serial dilution of lung homogenates on 7H11 OADC plates. The result for  
32 each mouse is indicated by a circle.

33 B) Relative representation of each mutant and WT strain in the inoculum used to infect mice.  
34 Total DNA was extracted from the assembled mix used to prepare the inoculum for infection

35 of the mice. The quantity of each mutant was evaluated by qPCR using primers specific for the  
36 tags. The amount of each mutant relative to H37Rv is plotted.

37

38 **Supplementary Figure S5: Impact of LprG O-mannosylation on the release of the LprG/LAM complex**  
39 **in *M. smegmatis*  $\Delta pmt$  or complemented with *pmt* from *M. tuberculosis*.**

40 Western-blot analyses of LAM associated with LprG purified from the *M. smegmatis*  $\Delta pmt$  mutant and  
41 the strain complemented with *pmt* from *M. tuberculosis*. Similar amounts of LprG-His protein purified  
42 from bacteria or culture medium were separated by SDS-PAGE. After transfer, the LAM or LprG-His  
43 molecules were revealed using anti-LAM or anti-His antibodies. Blots are representative of at least  
44 three independent experiments.

45

46 **Supplementary Figure S6: Partial top down ETD fragmentation spectrum of the 22,541 Da molecular**  
47 **mass ion precursor allowing the localization of the unique hexose on the T231.**

48 Peptide sequence of the precursor molecular ion reporting the detected fragment ions. For clarity, the  
49 observed ions are numbered according the sequence of the parent molecular ion that starts from the  
50 K31 of the gene-encoded sequence.

51

52 **Supplementary Figure S7: Growth on 7H11 plates of the *M. tuberculosis* recombinant strains**  
53 **producing WT LprG or LprG T231A.**

54 Serial dilutions of adjusted liquid cultures of various WT, mutant, and complemented strains were  
55 spotted on solid 7H11 OADC medium and incubated at 37°C. The results show that the capacity to form  
56 colonies on solid medium was restored in the strains producing either the LprG WT or the LprG T231A  
57 proteins.

58

59 **Supplementary Figure S8: Growth of WT or *M. tuberculosis* mutants in human phagocytes and TNF-**  
60  **$\alpha$  and IL-10 production by infected cells.**

61 A) Quantification of intracellular bacterial load in hMDM infected with WT,  $\Delta pmt$ ,  $\Delta lprG$  or  
62 complemented strains. For each time point, 50 infected cells were counted and distributed in  
63 three groups: cells containing 1-3 bacteria, 4-8 bacteria or more than 8 bacteria. The plotted  
64 results are representative of two independent experiments. They indicate that the capacity of  
65 both the  $\Delta pmt$  and  $\Delta lprG$  to multiply within hMDM was attenuated and that the  $\Delta lprG$  phenotype  
66 was complemented upon expression of either the *lprG* or the *lprG\** genes.

67 B) Inflammatory response of THP-1 infected with WT,  $\Delta pmt$  or complemented strains. Data are  
68 representative of two independent experiments performed in duplicate.

69

70 **Supplementary Figure S9: NK- $\kappa$ B activation in HEK-TLR2 cells incubated with LprG/LAM complexes**  
71 **purified from bacterial cells or culture medium of *M. smegmatis*  $\Delta pmt$  or *M. smegmatis*  $\Delta pmt$**   
72 **complemented with *pmt* from *M. tuberculosis***

73 HEK-TLR2 cells were incubated with 50 ng/ml or 10 ng/ml LprG-His and co-purified LAM and SEAP  
74 activity was quantified after 24h. PBS 1x or PAM<sub>3</sub>CSK<sub>4</sub> (10 ng/ml) were used as negative and positive  
75 controls respectively. Data are presented as the mean +/- SD of at least five independent experiments.

76 \*\*  $P < 0.01$ ; \* $P < 0.05$ .

77

78 **Supplementary Figure S10: Production of TNF- $\alpha$  by bone marrow-derived macrophages from WT,**  
79 **TLR2  $-/-$ , or MyD88 $-/-$  mice incubated with LprG/LAM complexes purified from bacterial cells or**  
80 **culture medium of *M. smegmatis*  $\Delta pmt$  or *M. smegmatis*  $\Delta pmt$  complemented with *pmt* from *M.***  
81 ***tuberculosis***

82 BMDM were incubated with 100 ng/ml of LprG-His and co-purified LAM and TNF- $\alpha$  was quantified  
83 after 24h by ELISA. PBS 1x, LPS (100 ng/ml) or PAM<sub>3</sub>CSK<sub>4</sub> (100 ng/ml) were used as negative and positive  
84 controls. Data are presented as the mean +/- SD of four independent experiments performed in  
85 duplicate. \*\*\*  $P < 0.001$ ; \* $P < 0.05$ .

86

87

88

89 **Supplementary Table S1: Primers used for the construction analysis of *M. tuberculosis* mutant strains.**

| <i>Construction of KO mutants</i> |                                      |                                                                                                                                                                           |                                                                                                                         |           |
|-----------------------------------|--------------------------------------|---------------------------------------------------------------------------------------------------------------------------------------------------------------------------|-------------------------------------------------------------------------------------------------------------------------|-----------|
| Reference strain                  | Mutant                               | Primers used for recombineiring system (construction AES)                                                                                                                 | Primers used for verification                                                                                           | reference |
| <i>M. tuberculosis</i><br>H37Rv   | H37Rv<br>ΔRv0175c                    | A: AACATTGGCGACGTCAACGAC<br>B: <u>ATCTACCAGATGCCAGCTAGCCT</u> TGTTCTGGGCACGCGTCC<br>C : <u>ATCAAGTCCAACACGTCACGCT</u> TCTTCGGGTCCGGATGGC<br>D: GGTTCAAACCTACGACGGGG       | Aout: ATTCGGTGTCTAGCGGTGG<br>Bout: AATGCCAACAAGCCAGCC<br>Cout: AACACAATGACGGGTCCG<br>Dout: ATAACCACAGCGGATGCGG          | This work |
|                                   | H37Rv<br>ΔRv0315                     | A: GTTCCTCAGCTCATCCGGC<br>B: <u>ATCTACCAGATGCCAGCTAGCCT</u> AAAGCCCACCGTTGCC<br>C: <u>ATCAACTTCTTCAAGAGCTGCC</u> GGTGTGAACCTTGCGG<br>D: TATGCCTGGCGGATGATGC               | Aout : TTTGGATTTCGATCCCAGC<br>Bout : TTCTTGATGGGCGTCCG<br>Cout : AAGACCTCAACGAGCCCATCC<br>Dout : TGCTGATCGGTTTCGTTTTCCG | This work |
|                                   | H37Rv<br>ΔRv0838                     | A : TATCCCAGGCTGCAGTGC<br>B: <u>TTCTACCAGATGCCAGCTAGCCT</u> AGCCCCACCATGAGCAGACG<br>C: <u>TTCATCAGCAGCAAGAACGC</u> ATTGCAACGCAGGGCGTCAG<br>D: AATCCACCAGCTGGTGAGCC        | Aout : TAAGCGTCCCAGCTCCG<br>Bout : TCGGCGACTCGGACCAACGG<br>Cout : TTCGGTCGATGTGACGTTTGC<br>Dout : TATCGCCAGCCAACCGTCCG  | This work |
|                                   | H37Rv<br>ΔRv1411c<br>(Δ <i>prG</i> ) | A: CGAATACCTCGACTTCCCCG<br>B : <u>ATCTACCAGATGCCAGCTAGCCT</u> CTTGAGAGCCTTGGTCTGCG<br>C : <u>ATCACTCGAGCAGTGCACG</u> TAAGGCAATTCCGTCCAGATGACC<br>D : AACCACAGCAGCATTCCGGC | Aout : ACCGACAGCGATGCGAGCG<br>Bout: GGTTGGTGGTGAGATCGC<br>Cout: CGATCATCAACTGGCACAGG<br>Dout: CAATCCGAGGATGTTGTGCC      | This work |
|                                   | H37Rv<br>ΔRv3491                     | A: TTTCTGATCCTGTCCGGC<br>B: <u>TCCTACCAGATGCCAGCTAGCCT</u> CAATTCCCAGTGCGACGG<br>C: <u>TCCACTACGCCATGTCGTCGT</u> CTTCACTGCAGCTCATCGGCC<br>D: AATTGGGTGGATCTCATGCG         | Aout: TATGCAGATGCCGTGGCG<br>Bout: AGGAGTAACTGCCATCCG<br>Cout:CGTTCAGCGACGAGACGC<br>Dout: ATCTATGACCAACTCAGCG            | This work |
|                                   | H37Rv<br>km <sup>R</sup>             | TTTTTTTCATGATAATAATGGTTTCTTAGACG<br>AAAAAAAAGCTTCTGTGCTGTTGTACATGTGCATACCAGATGCCAG<br>CTAGCATG                                                                            | KmFw: GACCATCAAGCATTTTATCCG<br>KmRv: ACCGAGGCAGTTCATAGG                                                                 | This work |
| Kanamycin                         | K1<br>K2<br>K3<br>K4                 | GACCATCAAGCATTTTATCC<br>ACCGAGGCAGTTCATAGG<br>GCCTAGAGCAAGACGTTTCC<br>AATTTAAAAGGATCTAGGTGAAGATCC                                                                         |                                                                                                                         | This work |

90 Restriction sites are underlined ; Common region and specific target of each mutant used in qPCR analysis are marked in bold.

91 **Supplementary Table S2: Strategy used for the construction of the various complementation plasmids**

92

| <i>Complementation strains</i>                       |                                                                    |                                                                                                                                                                                                                                            |           |
|------------------------------------------------------|--------------------------------------------------------------------|--------------------------------------------------------------------------------------------------------------------------------------------------------------------------------------------------------------------------------------------|-----------|
| Reference Strain                                     | Complementation                                                    | Description                                                                                                                                                                                                                                | reference |
| <i>M. tuberculosis</i><br>H37Rv $\Delta$ <i>lprG</i> | H37Rv<br>$\Delta$ <i>lprG</i> :: <i>Rv1410c</i>                    | Amplification of the <i>Rv1410c</i> gene with the primers AAGCAGCTGGTCGAGGAGG and TTTTAAGCTTCTTGGTCGGCACCGGC and insertion between the <i>PuvII</i> and <i>HindIII</i> sites of pMV361e Hyg integrative plasmid                            | This work |
|                                                      | H37Rv<br>$\Delta$ <i>lprG</i> :: <i>lprG</i>                       | Amplification of the <i>lprG</i> gene with the primers TTTTATCAGCTGGACCTCAAACCAG and TGCAGCATAAGCTTGCGCC and insertion between the <i>PuvII</i> and <i>HindIII</i> sites of pMV361e Hyg integrative plasmid                                | This work |
|                                                      | H37Rv<br>$\Delta$ <i>lprG</i> :: <i>lprG-Rv1410c</i>               | Amplification of the operon <i>lprG-Rv1410c</i> performed with primers TTTTATCAGCTGGACCTCAAACCAG and TTTTAAGCTTATCGCCGACGCGATCTTGGTC and insertion between the <i>PuvII</i> and <i>HindIII</i> sites of pMV361e Hyg integrative plasmid    | This work |
|                                                      | H37Rv<br>$\Delta$ <i>lprG</i> :: <i>lprG-Rv1410c gfp</i>           | Amplification of the operon <i>lprG-Rv1410c</i> performed with primers TTTTATCAGCTGGACCTCAAACCAG and TTTTAAGCTTATCGCCGACGCGATCTTGGTC and insertion the <i>PuvII</i> and <i>HindIII</i> sites of pMV361e Hyg <i>gfp</i> integrative plasmid | This work |
|                                                      | H37Rv<br>$\Delta$ <i>lprG</i> :: <i>lprG</i> *- <i>Rv1410c gfp</i> | The punctual mutation was introduced by amplification of the whole integrative plasmid pMV361 <i>lprG-Rv1410c gfp</i> Hyg with CGAGAAGGTCCAGGTCGCGAAGCCCCGGTGAGCTGATC GATCAGCTCACCGGGGGCTTCGCGACCTGGACCTTCTCG                              | This work |

93

94 **Supplementary Table S3: Primers used for the qPCR analysis**

95

| Name              | Sequence                   |
|-------------------|----------------------------|
| Rv0175c variable  | GTCTTCTCGACCACCACAGAT      |
| Rv0315 variable   | GGGCAGCTCTTGAAGAAGTT       |
| Rv0838 variable   | ATGCGTTCTTGCTGCTGAT        |
| Rv3491 variable   | GACGACGACATGGCGTAGT        |
| Rv1411c variable  | AGTACGTGCACTGCTCGAGT       |
| qPCR km Fw        | CGATGAGTTTTTCTAACTGTCAGACC |
| qKmFint           | TGATGCGCTGGCAGTGTT         |
| qKmRint (commonR) | CGCGATCGCTGTAAAAGGA        |

96



MS/MS Fragmentation of DCVAATQAPDAGAMSQK

Found in RVBD\_0175T.1 in MTBtuberculist\_R27, RVBD\_0175T.1|RVBD\_0175|Mycobacterium tuberculosis H37Rv (Broad V3) MCE-associated membrane protein (214 aa)

Match to Query 77813: 2170.921448 from(1086.468000,2+) index(78042)

Variable modifications:

C2 : Carbamidomethyl (S)

S17 : HexINL (ST), with neutral losses 162.052823 (shown in table), 0.000000

Ions Score: 121 Expect: 6.9e-012

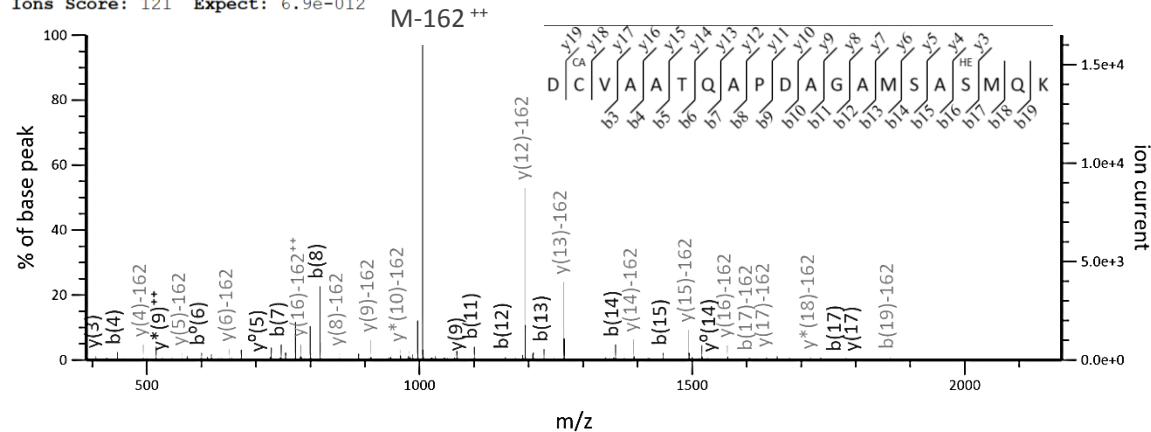

MS/MS Fragmentation of PAGPTPAPAAPAAATGGLLFHDEFDGPAGSVPDPSPK

Found in RVBD\_0315T.1 in MTBtuberculist\_R27, RVBD\_0315T.1|RVBD\_0315|Mycobacterium tuberculosis H37Rv (Broad V3) hypothetical protein (295 aa)

Match to Query 15435: 3544.704495 from(1182.575441,3+) index(2655)

Monoisotopic mass of neutral peptide Mr(calc): 3544.699829

Variable modifications:

S35 : Hex(1)NLI (ST) (ST), with neutral loss 162.052823

Ions Score: 29 Expect: 0.0043

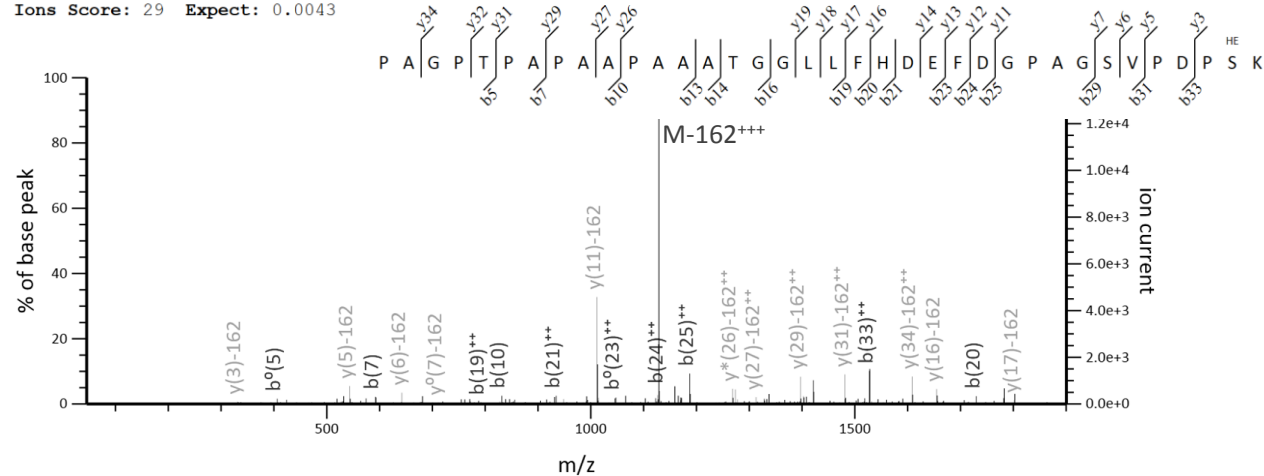

MS/MS Fragmentation of VQVTKPPVS

Found in RVBD\_1411cT.1 in MTBtuberculist\_R27, RVBD\_1411cT.1|RVBD\_1411c|Mycobacterium tuberculosis H37Rv (Broad V3) lipoprotein lprG (237 aa)

Match to Query 16700: 1115.607248 from(558.810900,2+) index(80564)

Monoisotopic mass of neutral peptide Mr(calc): 1115.607422

Variable modifications:

T4 : HexINL (ST), with neutral losses 0.000000 (shown in table), 162.052823

Ions Score: 25 Expect: 0.039 (help)

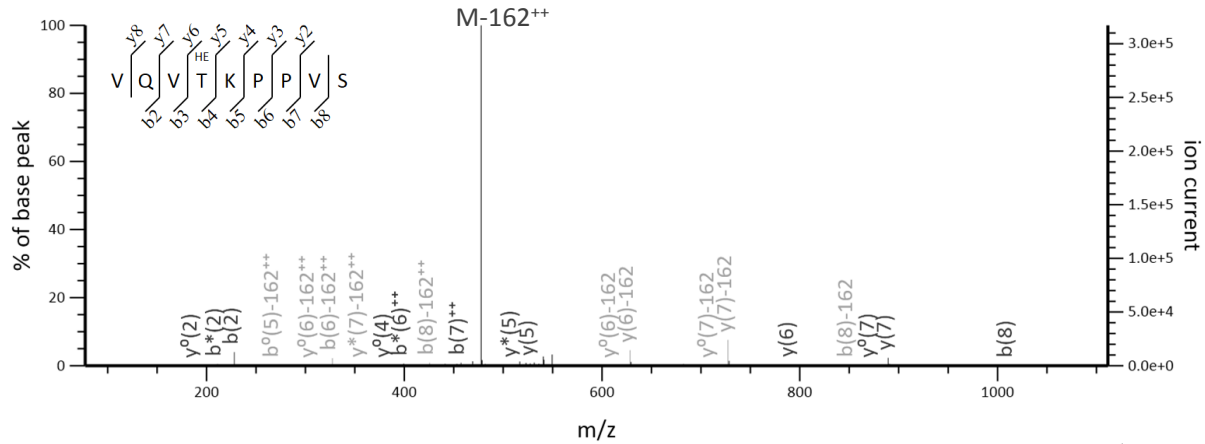

MS/MS Fragmentation of TTTSPGPVPPVSEAAR

Found in RVBD\_0838T.1 in MTBtuberculist\_R27, RVBD\_0838T.1|RVBD\_0838|Mycobacterium tuberculosis H37Rv (Broad V3) D-alanyl-D-alanine dipeptidase (257 aa)

Match to Query 70844: 1889.908848 from(945.961700,2+) index(55551)

Monoisotopic mass of neutral peptide Mr(calc): 1889.910599

Variable modifications:

S5 : HexINL (ST), with neutral losses 162.052823 (shown in table)

S12 : HexINL (ST), with neutral losses 162.052823 (shown in table)

Ions Score: 55 Expect: 1.4e-005

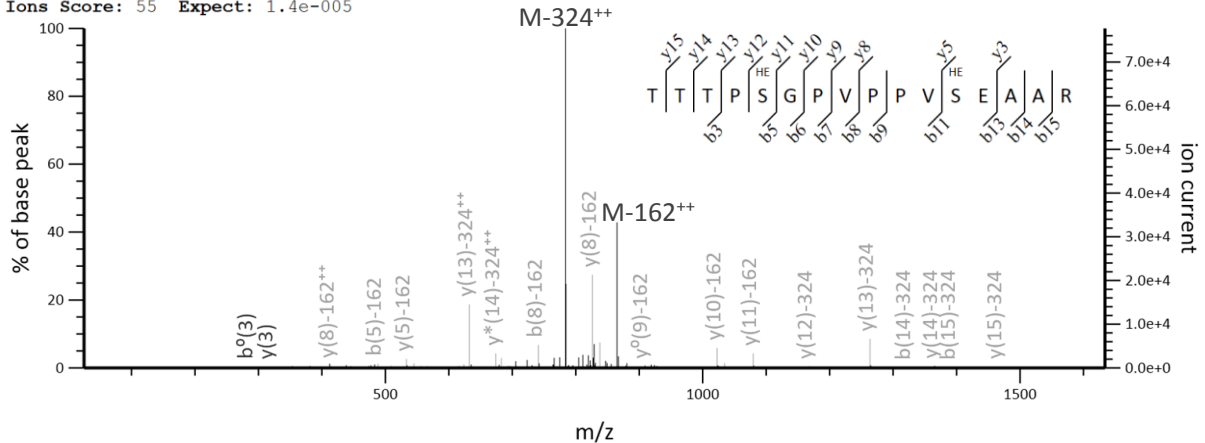

MS/MS Fragmentation of QPFLQLIGPPSPVQR  
 Found in Rv3491\_Rv3491 in MTBTuberculist\_R27, Rv3491\_Rv3491

Match to Query 75159: 2022.089448 from(1012.052000,2+) index(76792)

**Monoisotopic mass of neutral peptide Mr(calc):** 2022.078598

**Variable modifications:**

**S13** : HexINL (ST), with neutral losses 162.052823 (shown in table)

**Ions Score:** 49 **Expect:** 3.4e-005

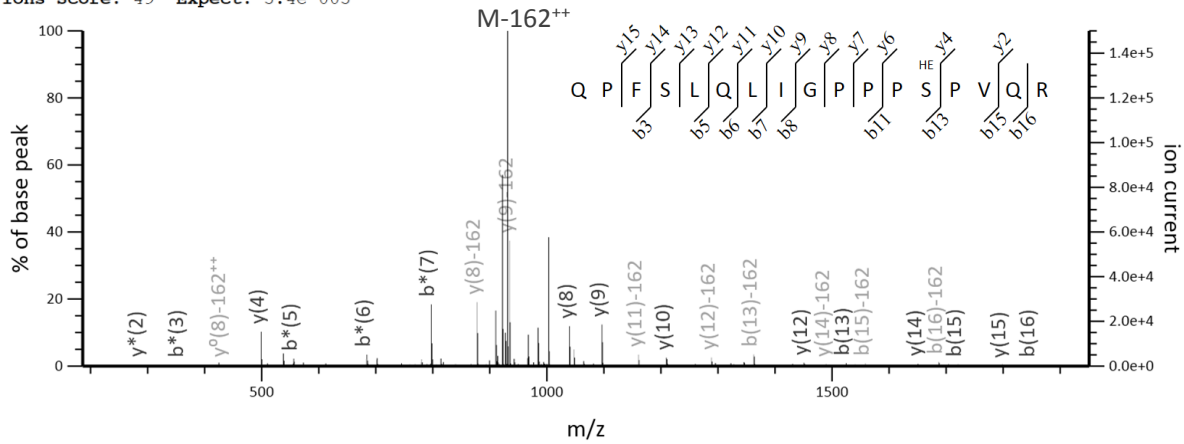

Figure S1

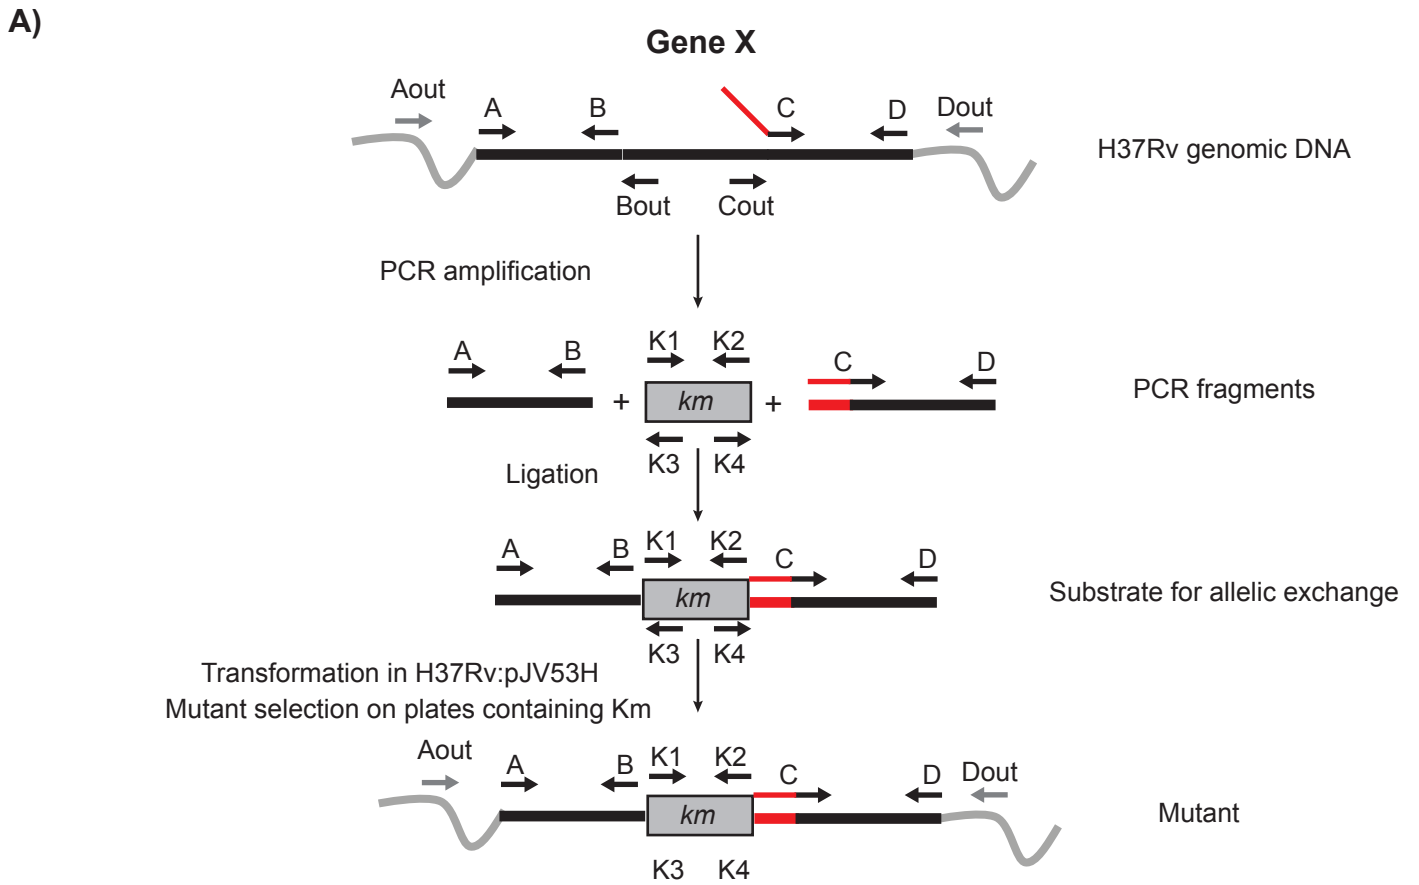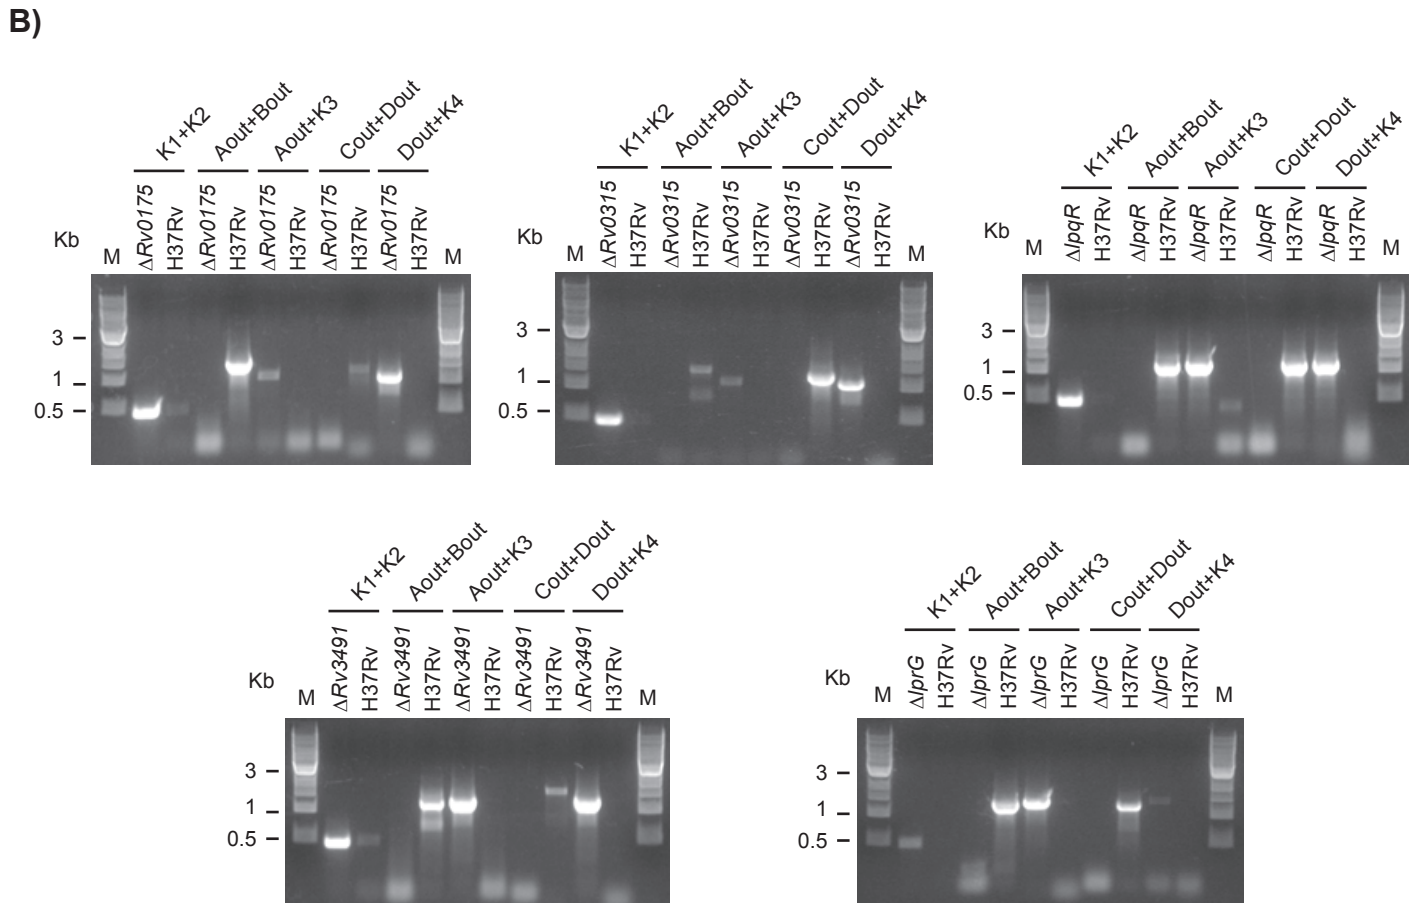

Figure S2

A)

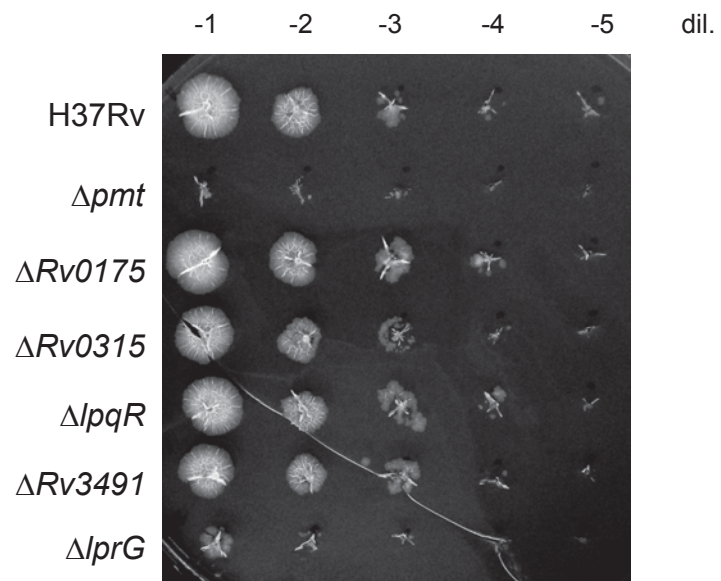

B)

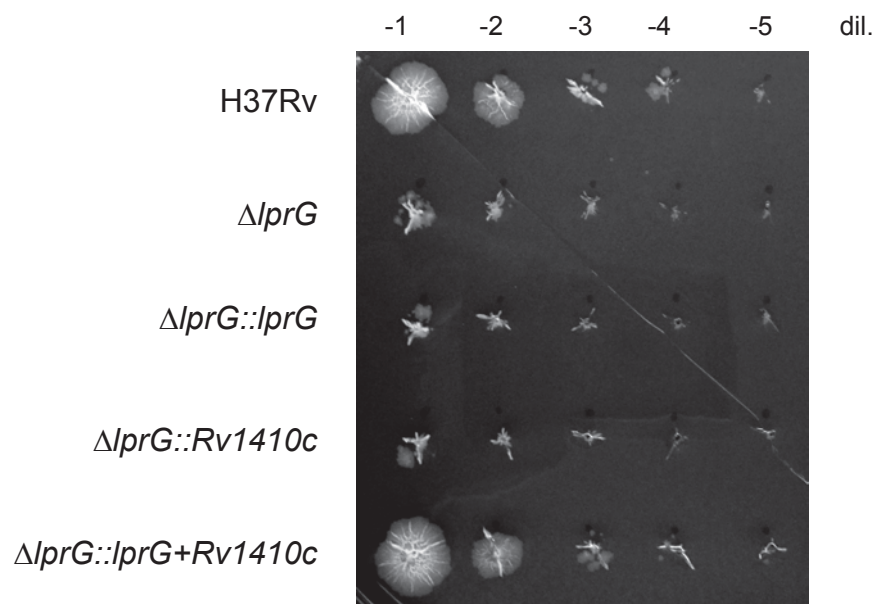

Figure S3

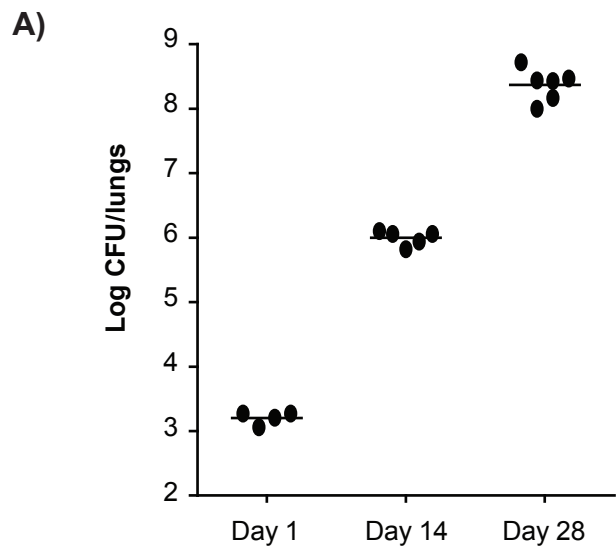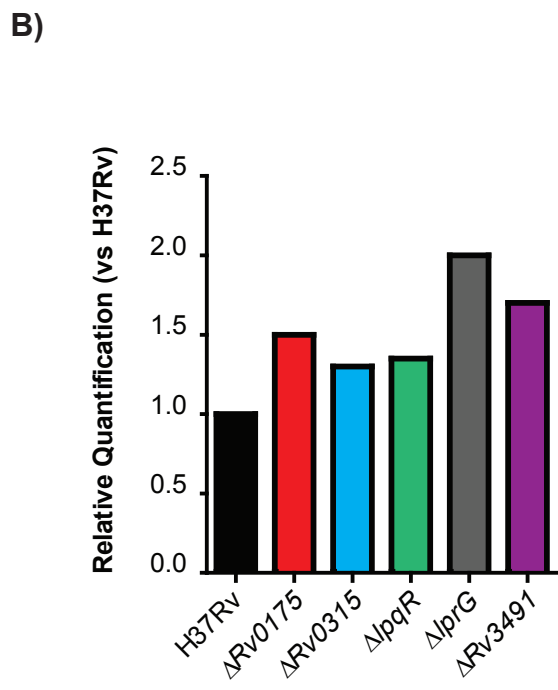

Figure S4

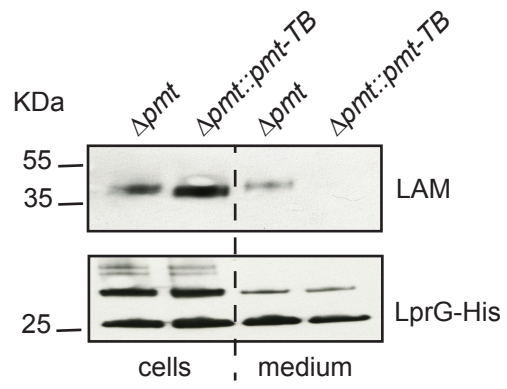

Figure S5

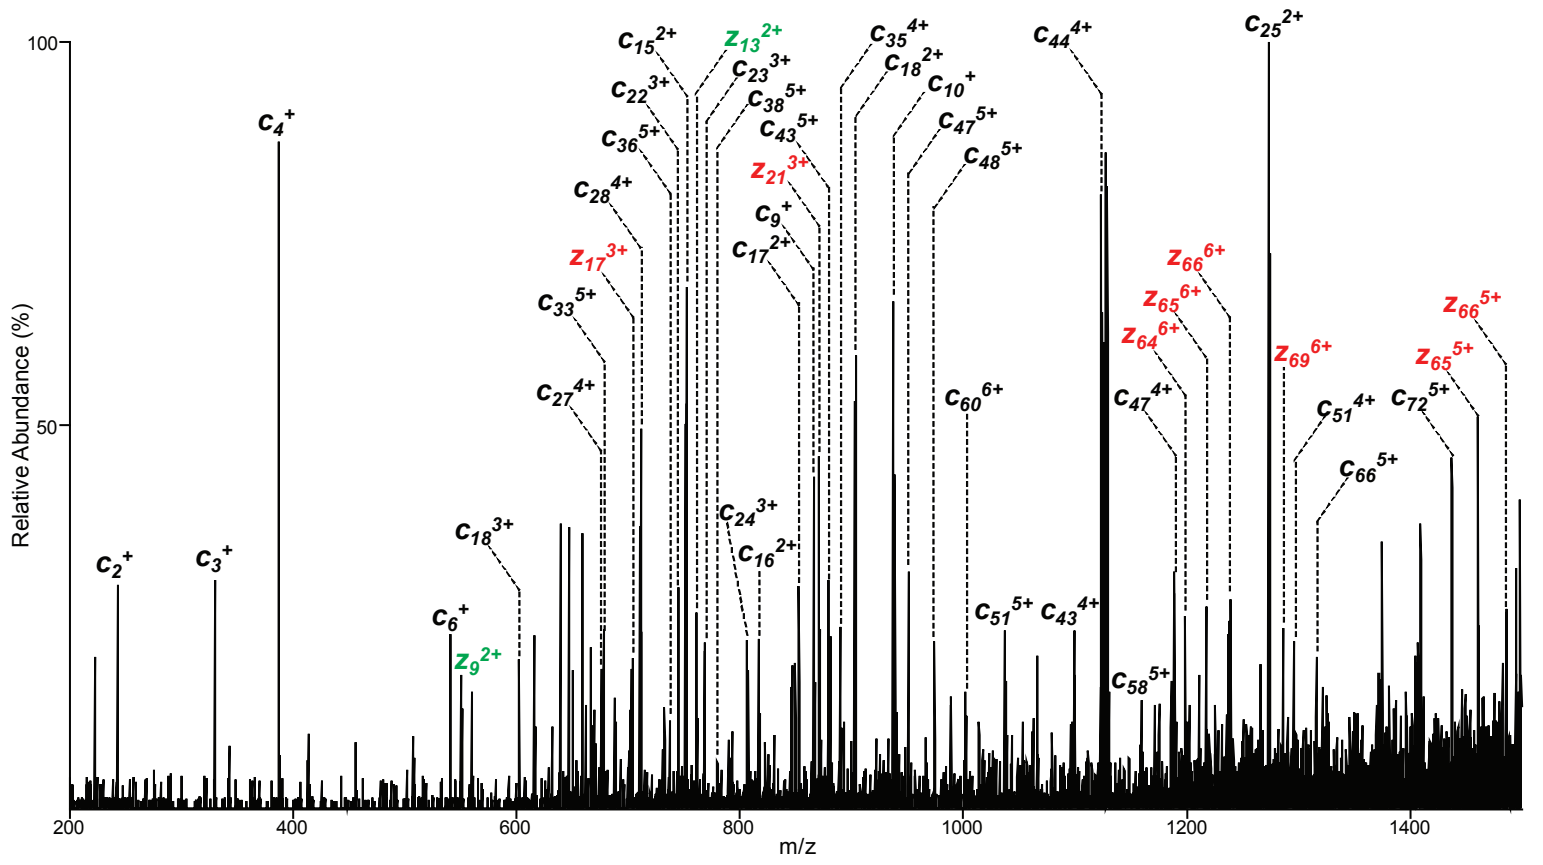

*C*<sub>1</sub> K P S G G P L P D A K P L V E E A T A Q T K A L K S A H M V L T V N G K *Z*<sub>178</sub>  
*C*<sub>37</sub> I P G L S L K T L S G D L T T N P T A A T G N V K L T L G G S D I D A D *Z*<sub>142</sub>  
*C*<sub>73</sub> F V V F D G I L Y A T L T P N Q W S D F G P A A D I Y D P A Q V L N P D *Z*<sub>106</sub>  
*C*<sub>109</sub> T G L A N V L A N F A D A K A E G R D T I N G Q N T I R I S G K V S A Q *Z*<sub>70</sub>  
*C*<sub>145</sub> A V N Q I A P P F N A T Q P V P A T V W I Q E T G D H Q L A Q A Q L D R *Z*<sub>34</sub>  
*C*<sub>181</sub> G S G N S V Q M T L S K W G E K V Q V T K P P V S T S H H H H H *Z*<sub>1</sub>

Figure S6



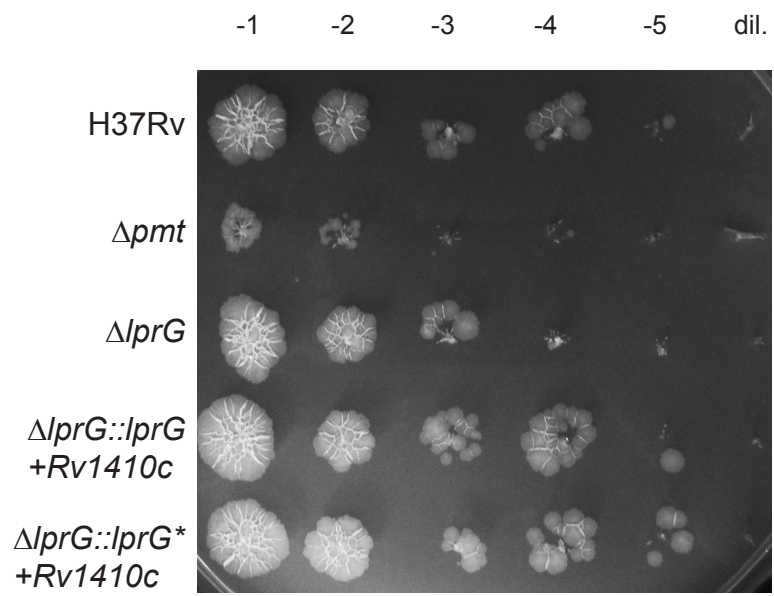

Figure S7

**A)**

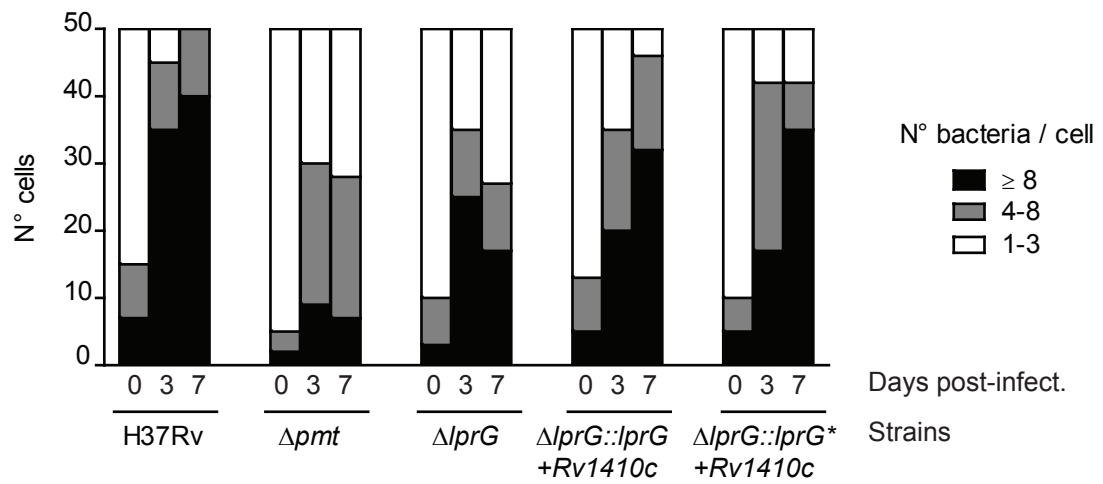

**B)**

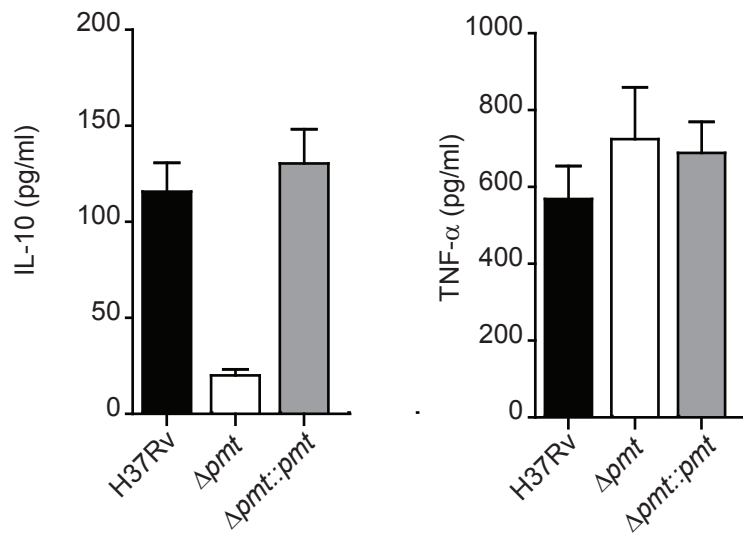

Figure S8

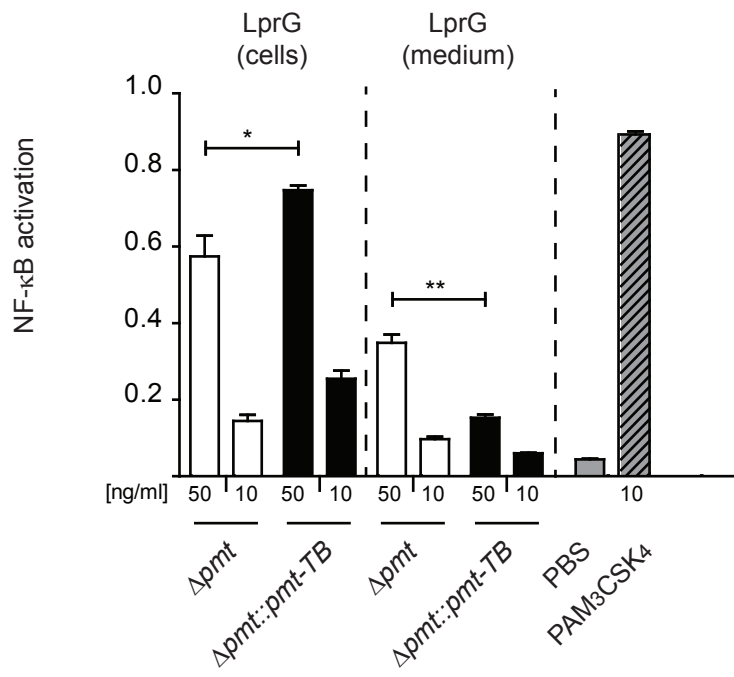

Figure S9

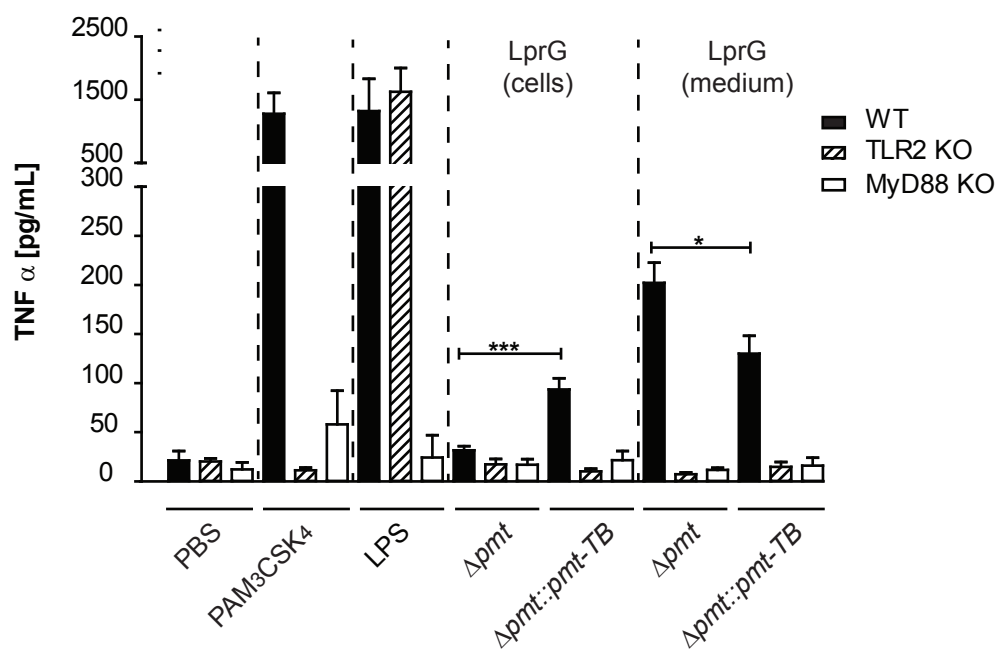

Figure S10
